# Supplementary material
Source: PubMed Central journal article supplement (PMC10246178)
Supplement: media-1.pdf [file media-1.pdf]

## Supplementary Materials

### GeneMark-ETP: Automatic Gene Finding in Eukaryotic Genomes in Consistence with Extrinsic Data

Tomas Bruna <sup>1</sup>, Alexandre Lomsadze <sup>2</sup> and Mark Borodovsky <sup>1,2,3</sup>,

1 School of Biological Sciences, Georgia Institute of Technology, Atlanta, GA 30332, USA

2 Wallace H. Coulter Department of Biomedical Engineering, Georgia Institute of Technology, Atlanta, GA 30332, USA

3 School of Computational Science and Engineering, Georgia Institute of Technology, Atlanta, GA 30332, USA

## Supplementary Methods

### S1. Additional details on the processing of the GeneMarkS-T predictions

#### S1.1 Prediction of 5' complete and 5' partial genes.

To improve accuracy of gene predictions by GeneMarkS-T we used the following inequality:

$$(b - a) - (a - 1) + 1000 * \ln \frac{AAI_{partial}}{AAI_{complete}} > 0 \quad (S1)$$

Here (a) and (b) are positions of the starts of the local alignments within the target protein when aligned against the longer and shorter protein queries, recalculated to longer query.  $AAI_{partial}$  and  $AAI_{complete}$  are, respectively, the percentages of amino acid identities in the alignments of the longer and shorter proteins to the target protein (see Fig. S9 and S10).

Inequality (S1) is used to discriminate between two possibilities: a correctly predicted incomplete protein vs a true complete protein incorrectly extended into incomplete one. If the extension is not supported by a protein alignment, then the complete protein option is selected. To characterize the alignment of a protein query and a protein target we selected the following features:

- I) The length of the query sequence upstream to the start of the local alignment of the initial long query and target (fragment “a-1” in Fig. S9).
- II) The difference between starts of the two alignments with the target protein (“b-a” in Fig. S10).
- III) Ratio of the AAI of an alignment within the range “a-c” to the AAI of alignment within the range “b-c”

A large length “a-1” would indicate possible translation of a part of the 5’ UTR region of the query gene. A small length “b-a” (Fig. S9) is interpreted as alignment of a fragment of translation of 5’ UTR of a query gene. Increase of the AAI ratio favors the 5’ partial candidate.

The first two features are measured in numbers of AA and the third one is dimensionless. We scale the third feature by using logarithm with a factor 1,000, i.e.  $1,000 \cdot \log()$ . The larger value of the ratio would correspond to more conserved sequence alignment in the range “b-a”.

### **S1.2 Removal of the 3’ partial predictions**

The 3’ partial predictions were rarely observed; they usually originated from a gene prediction error rather than from a 3’ partial assembly. This frequency pattern could be expected since RNA-Seq libraries, prepared with the poly-A tail enrichment of mRNA transcripts, should predominantly carry transcripts complete at 3’ ends (Zhao et al. 2014). This consideration justifies the removal of all the 3’ partial genes from the list of candidates for high-confidence genes.

### **S1.3. Adjustment of gene predictions being shorter than the longest ORF**

Most eukaryotic genes are translated from the start codon closest to the transcript 5’ end (Kozak 1999). Still, the translation can be initiated at one of the downstream starts; e.g., when the most upstream start has a weak translation initiation signal (the Kozak pattern (Kozak 1987)). GeneMarkS-T accounts for the possibility of non-5’-most translation start codons by predicting the translation start based on the strength of its Kozak pattern (derived in species-specific self-training). However, because the Kozak pattern is relatively weak, the GeneMarkS-T non-5’-most start codon predictions exhibit a higher false-positive rate than the 5’-most start codon predictions (the bias in reference annotations towards the 5’-most translation initiation sites cannot be excluded as well). To improve gene start prediction, GeneMark-ETP uses extrinsic evidence. If the translation of a predicted gene is extended to the 5’-most start codon, and this translation is supported by external protein evidence, GeneMark-ETP extends the predicted gene with non-5’-most start to the longest open reading frame. Obviously, the remaining non-5’-most start gene predictions, that may appear among the high-confidence genes, become more reliable than the genes predicted by GeneMarkS-T in the original set.

### **S1.4 Complete genes with full protein support**

A gene predicted by GeneMarkS-T is said to have full protein support if there is a protein in a database whose significant BLASTp alignment to the predicted protein satisfies condition (S2)

$$(|Q_{start} - T_{start}| \leq 5) \wedge (|(Q_{len} - Q_{end}) - (T_{len} - T_{end})| \leq 20) \quad (S2)$$

The terms used in (S2) are determined by features of an alignment of the query (predicted protein) and target, a protein found by the DIAMOND similarity search (Fig. S11). Here,  $Q_{start}, Q_{end}$ , respectively, are the positions of the start and end of the alignment within the

query protein;  $T_{start}, T_{end}$ , respectively, are the positions of the start and end of the alignment within the target protein;  $Q_{len}, T_{len}$ , respectively, are the lengths of the query protein and the aligned target.

Experiments with multiple sequence alignment (MSA) of orthologous proteins demonstrated that internal section of MSA is usually the most conserved, while the protein N-proximal region is less conserved and the least conserved region in MSA is usually C-proximal region. Therefore, condition (S2) allows misalignments both at the start of the query to target alignment and at the end of the alignment, even to a larger degree. A query protein whose alignment to at least one target out of the 25 best satisfies condition (S2) is classified as fully supported by the target.

### **S1.5 Assessment of accuracy of the transcript classification rules**

To assess the accuracy of classification made with help of Inequality (1) and Condition (2), we used the following approach. First, we prepared test sets of complete and partial genes. The ground-truth labels were determined by comparisons with reference annotations; the set of training data contained GeneMarkS-T gene predictions in transcripts from each genome (Table 3). Next, we selected features for computations of scores used in Inequality (1) and Condition (2). To prove that (1) and (2) produce efficient classification, we used two approaches. We trained random forest and logistic regression classifiers (with Python's scikit-learn machine learning library) — using all alignment features offered by DIAMOND's tabular output (Buchfink et al. 2015) — to classify predictions as complete/partial by using (1), or true/false by using (2). We observed that use of Inequality (1) and Condition (2) for classification of GeneMarkS-T predictions in the test set (not overlapping with the training set) produced more accurate results than ones generated with application of general-purpose random forest or logistic regression models.

### **S2. Analysis of the ProtHint support for additional candidates for high-confidence genes**

GeneMarkS-T gene predictions not fully supported by proteins could be classified as high-confidence genes (Section 2.2.3). Such predictions should satisfy several conditions, one of which is no contradiction to the ProtHint hints. To give more details, let consider the prediction process step-by-step. First, a gene predicted in a transcript by GeneMarkS-T is mapped to genomic DNA. Next, ProtHint uses the gene mapped to DNA as the gene seed, and ProtHint hints are generated as described in GeneMark-EP+ (Bruna et al. 2020). At this point, elements of the transcript-mapped exon-intron structure (introns, start and stop codons) are compared to the ProtHint hints. The conflict exists if (i) at least one of ProtHint's introns overlaps an exon, or (ii) a ProtHint defined stop codon overlaps an exon or intron, or (iii) a ProtHint start codon overlaps an exon or intron (except the start-to-start overlap).

### S3. MAKER2 vs GeneMark-ETP experiments

Three model organisms representing three different types of genome organization were selected for MAKER2 and GeneMark-ETP experiments:

- *Drosophila melanogaster* – small GC homogeneous genome.
- *Danio rerio* – large GC homogenous genome
- *Mus musculus* – large GC heterogeneous genome

The same input information was provided to MAKER2 and GeneMark-ETP.

Repeat coordinates predicted by RepeatMasker software were reformatted to MAKER2 supported GFF format as:

```
rmasker_out2maker_gff.pl < genome.fasta.out > repeatmasker.gff
```

Transcripts assembled in GeneMark-ETP runs from RNA-Seq by HISAT2/StringTie2 were provided as transcriptome input to MAKER2.

Proteins from the following species in OrthoDB were used as input to MAKER2 and GeneMark-ETP:

For *Drosophila melanogaster* 274,283 proteins from:

*Drosophila ananassae*  
*Drosophila biarmipes*  
*Drosophila bipectinate*  
*Drosophila busckii*  
*Drosophila elegans*  
*Drosophila erecta*  
*Drosophila eugracilis*  
*Drosophila ficusphila*  
*Drosophila grimshawi*  
*Drosophila hydei*  
*Drosophila mojavensis*  
*Drosophila obscura*  
*Drosophila pseudoobscura*  
*Drosophila rhopaloea*  
*Drosophila serrata*  
*Drosophila takahashii*  
*Drosophila virilis*  
*Drosophila willistoni*  
*Drosophila yakuba*

For *Danio rerio* 181,842 proteins from:

*Cyprinus carpio*  
*Sinocyclocheilus anshuiensis*

*Sinocyclocheilus Sahari*  
*Sinocyclocheilus rhinoceros*

For *Mus musculus* 207,553 proteins from:

*Cavia porcellus*  
*Cricetulus griseus*  
*Fukomys damarensis*  
*Ictidomys tridecemlineatus*  
*Marmota marmota marmota*  
*Mesocricetus auratus*  
*Mus caroli*  
*Mus Sahari*  
*Octodon degus*  
*Rattus norvegicus*

MAKER2 was executed with three gene finders: AUGUSTUS, GeneMark.hmm and SNAP.  
The following model file were used by gene finders:

For prediction in *Drosophila melanogaster*:

AUGUSTUS – “fly” from AUGUSTUS distribution.  
GeneMark.hmm – model created by GeneMark-ETP.  
SNAP – “D.melanogaster.hmm” from SNAP distribution.

For prediction in *Danio rerio*:

AUGUSTUS – “zebrafish” from AUGUSTUS distribution.  
GeneMark.hmm – model created by GeneMark-ETP.  
SNAP – model trained according to instructions from SNAP distribution. The training set matches the test set used for evaluation of MAKER2 performance. All the other training steps were done using scripts from SNAP distribution.

For prediction in *Mus musculus*:

AUGUSTUS – “human” from AUGUSTUS distribution.  
GeneMark.hmm – model created by GeneMark-ETP on mouse genome for medium GC bin.  
SNAP – “mam46.hmm” mammalian model for medium GC bin from SNAP distribution.

MAKER2 was executed with the following setting in the MAKER2 configuration file:

```
genome=genome.fasta  
est=transcriptome.fasta  
protein=proteindb.fasta  
model_org= #empty  
rm_gff=repeatmasker.gff  
snaphmm=snap.model  
gmhmm=genemark.mod
```

```

augustus_species=model_name
est2genome=1
protein2genome=1
alt_splice=1
always_complete=1
keep_preds=1 for D. melanogaster
keep_preds=0 for D. rerio and M. musculus
split_hit=20000
max_dna_len=1000000

```

MAKER2 was executed on Azure cloud LINUX node with 96 cores in MPI mode.

Accuracy of MAKER2 and GeneMark-ETP runs was estimated as it is described in the main text of this paper. Accuracy on exon, transcript and gene levels is shown in Tables S11.

### Supplementary Figures

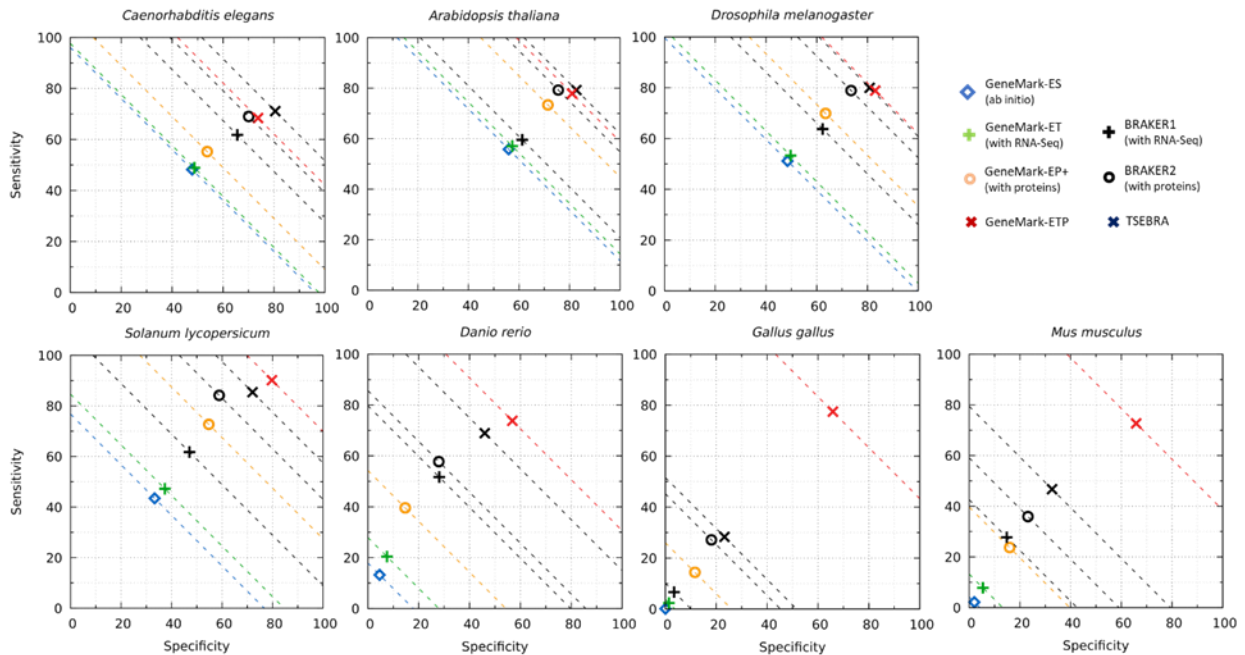

**Figure S1.** Gene level accuracy of the seven gene prediction tools (see legends to Figs. 1, 2). Compared to the figures in the main text, where we used smaller size reference protein databases for each species (all proteins of the same taxonomic order were excluded from the corresponding  $IP_0$  databases), here we used larger size databases (proteins from the same species excluded from the corresponding  $IP_0$  databases).

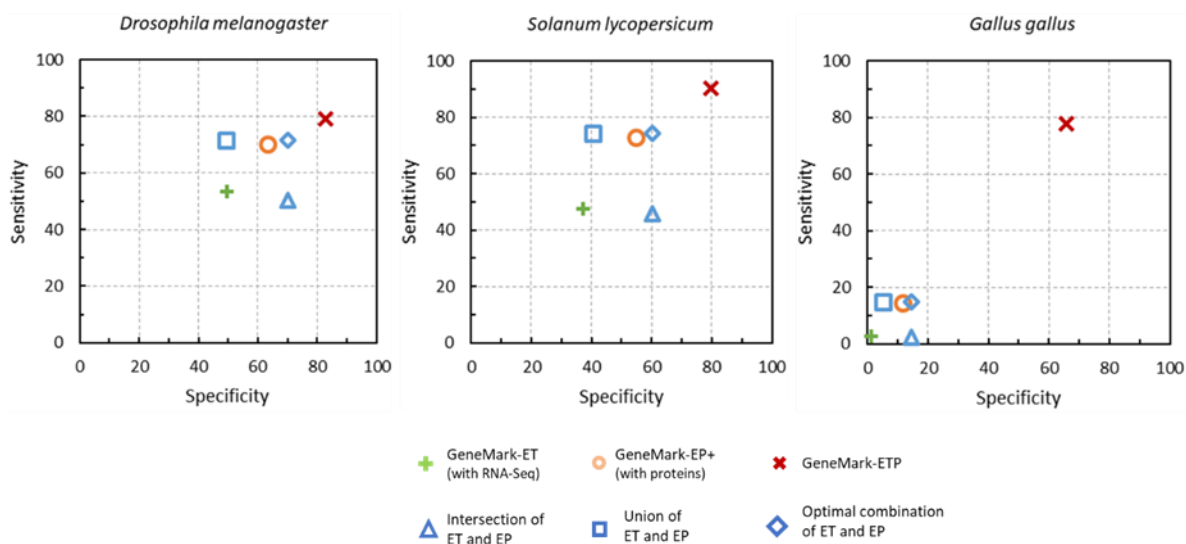

**Figure S2.** Gene-level accuracy of the virtual optimal combinations of GeneMark-ET and GeneMark-EP+ (Fig. 3) along with the prediction accuracy of GeneMark-ETP. The results for *D. melanogaster* were obtained for a large reference database (only proteins of the same species were excluded from the corresponding IP<sub>0</sub> database); for the other two genomes, proteins of the same taxonomic order were removed from the corresponding IP<sub>0</sub> database.

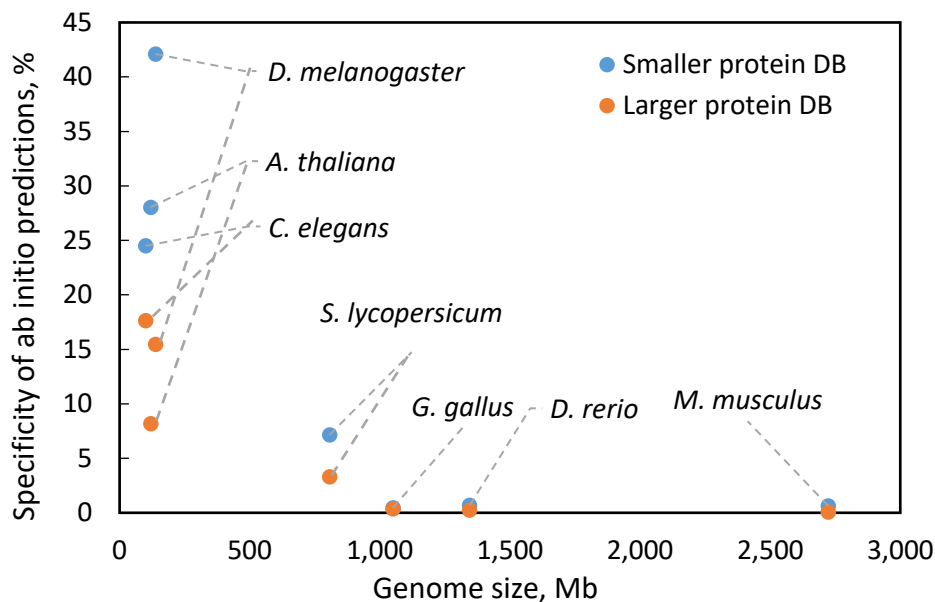

**Figure S3.** *Ab initio* gene predictions were divided into two categories (see Table 2). Those that could be at least partly supported by available extrinsic evidence in an *a posteriori* analysis and those that could not receive support by any extrinsic evidence at any stage of the analysis (unverified). The figure shows the dependence of the Specificity of unverified *ab initio* gene predictions on the size of the genome, as observed in our experiments.

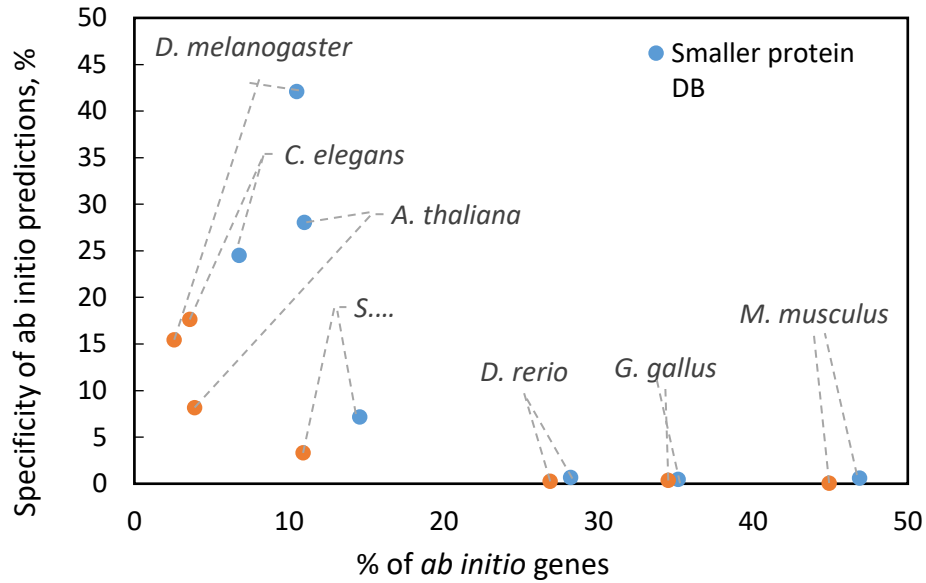

**Figure S4.** The Y-axis shows the same variable as the one described in Fig. S7. The X-axis shows a fraction (%) of *ab initio* predicted unverified genes among the whole set of genes predicted in each genome.

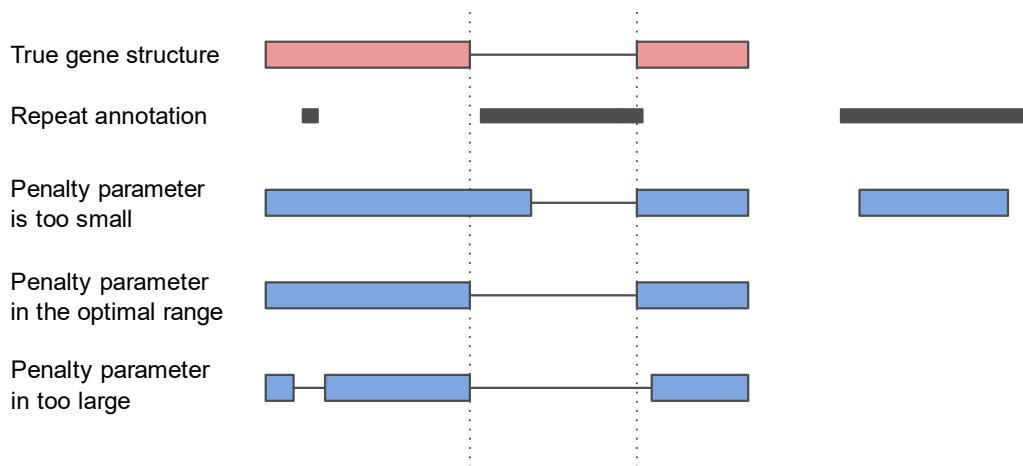

**Figure S5.** Possible aberrations in gene prediction caused by inadequate selection of the repeat penalty parameter.



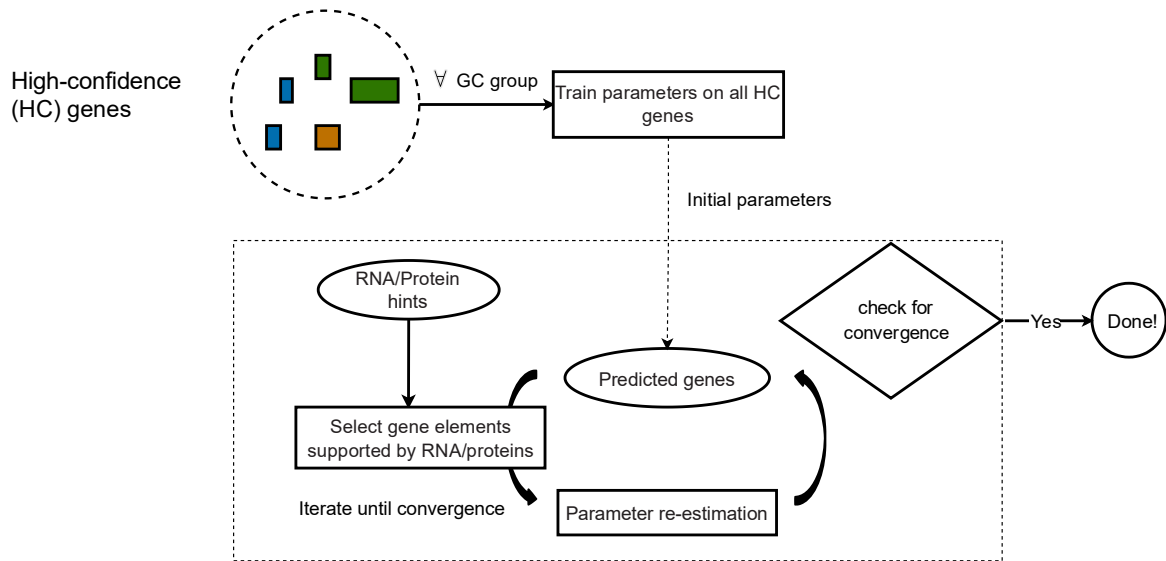

**Figure S6.** Workflow of the GHMM model training procedure for the GeneMark.hmm algorithm in GeneMark-ETP.

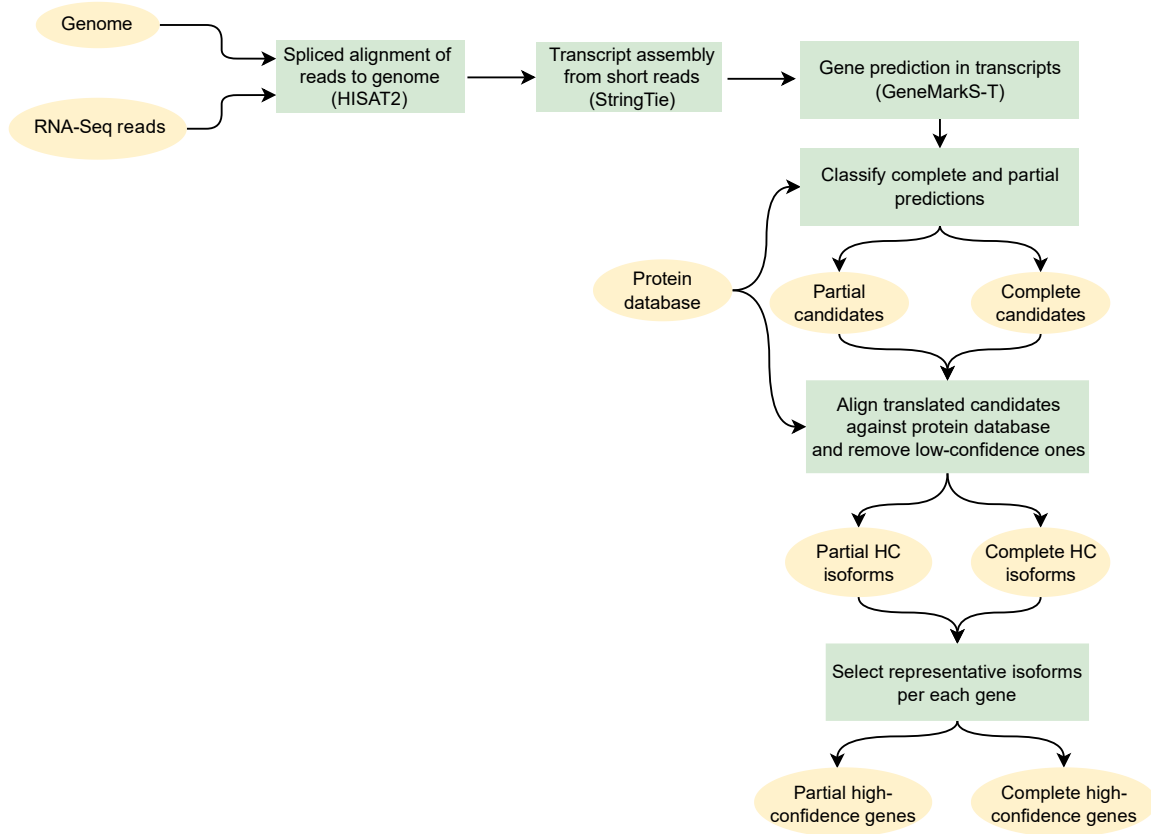

**Figure S7.** High-level schematics of the procedure of the identification of high-confidence (HC) genes and selection of representative HC isoforms.

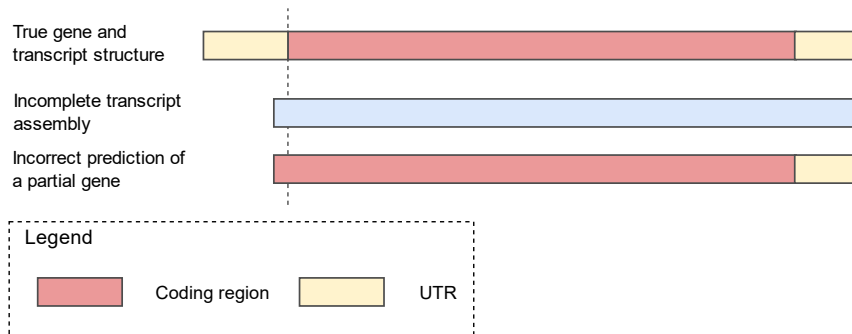

**Figure S8.** An example of an incorrect prediction of a partial gene. The assembly contains a complete coding region and a part of true 5' UTR. The coding region predicted in transcript was incorrectly extended to the 5' end of the transcript due to the shortened 5' UTR.

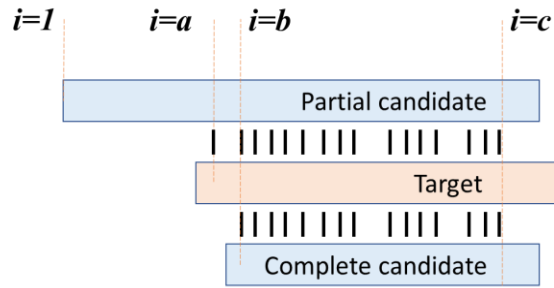

**Figure S9.** The GeneMarkS-T gene prediction could be classified as complete gene. (a) and (b) are positions of the starts of the local alignments of respective longer and shorter protein queries. (c) is the end position of the local alignments.

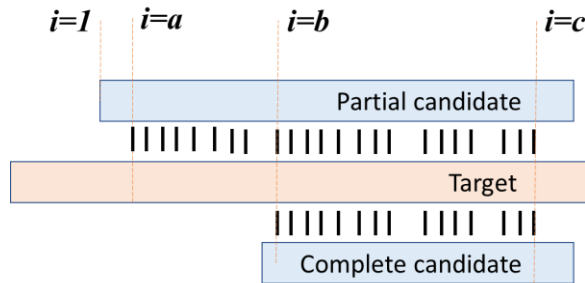

**Figure S10.** The GeneMarkS-T gene prediction could be classified as a 5' partial gene. (a) and (b) are positions of the starts of the local alignments of respective longer and shorter protein queries. (c) is the end position of the local alignments.

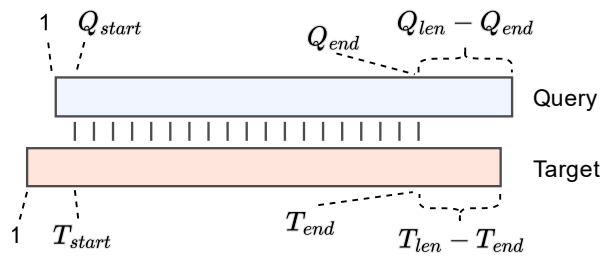

**Figure S11.** The alignment features used to select complete high-confidence genes based on protein support.

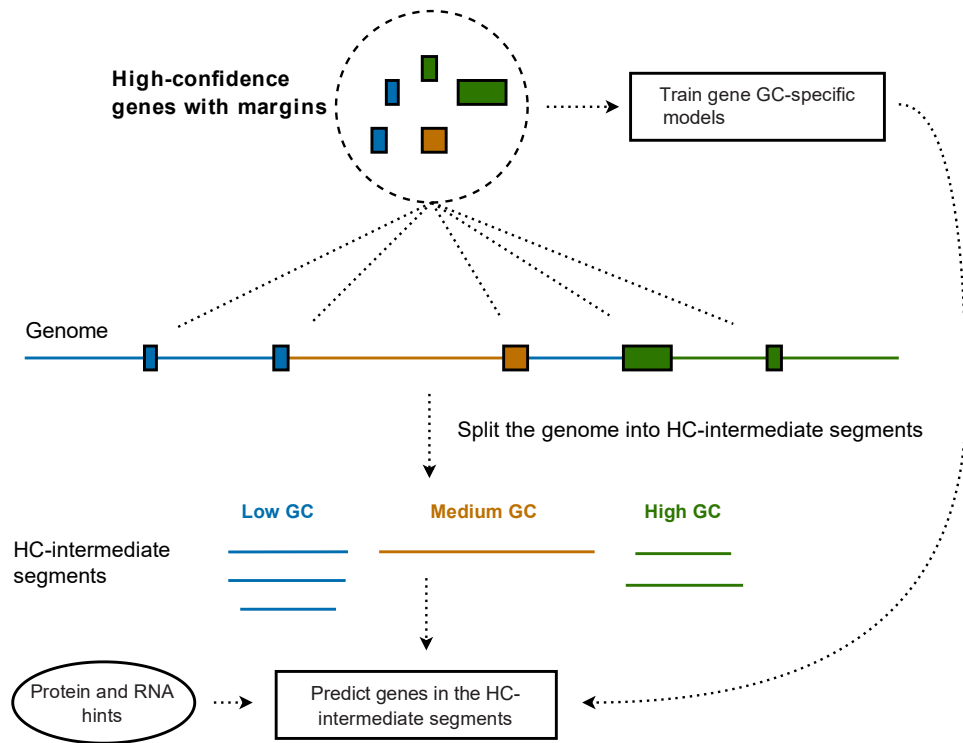

**Figure S12.** Schematics of the identification and use of the HC-intermediate regions in training and gene prediction

## Supplementary Tables

**Table S1.** Gene- and exon-level prediction accuracy of the *ab initio* GeneMark-ES, the RNA-Seq-based GeneMark-ET, the protein-based GeneMark-EP+, and GeneMark-ETP. The accuracy estimates are shown for the smaller (order excluded) and for the larger (species excluded) protein databases (see Materials).

|                        |         | ES   | ET   | Smaller protein DB |      | Larger protein DB |      |
|------------------------|---------|------|------|--------------------|------|-------------------|------|
|                        |         |      |      | EP+                | ETP  | EP+               | ETP  |
| <i>C. elegans</i>      | Gene Sn | 48.2 | 48.9 | 48.5               | 60.4 | 55.2              | 68.4 |
|                        | Gene Sp | 47.9 | 48.8 | 46.8               | 67.7 | 53.8              | 73.8 |
|                        | Gene F1 | 48.0 | 48.8 | 47.6               | 63.8 | 54.5              | 71.0 |
|                        | Exon Sn | 81.8 | 81.7 | 81.1               | 82.9 | 83.3              | 85.9 |
|                        | Exon Sp | 83.1 | 83.7 | 82.0               | 90.1 | 84.9              | 91.4 |
|                        | Exon F1 | 82.5 | 82.7 | 81.5               | 86.4 | 84.1              | 88.6 |
| <i>A. thaliana</i>     | Gene Sn | 55.8 | 57.1 | 66.6               | 75.8 | 73.4              | 77.9 |
|                        | Gene Sp | 55.9 | 57.3 | 65.9               | 80.0 | 71.5              | 81.0 |
|                        | Gene F1 | 55.9 | 57.2 | 66.3               | 77.8 | 72.4              | 79.4 |
|                        | Exon Sn | 76.9 | 77.1 | 79.8               | 82.3 | 81.5              | 82.9 |
|                        | Exon Sp | 80.8 | 82.1 | 84.9               | 90.9 | 86.3              | 91.0 |
|                        | Exon F1 | 78.8 | 79.5 | 82.3               | 86.4 | 83.8              | 86.8 |
| <i>D. melanogaster</i> | Gene Sn | 51.2 | 53.3 | 56.5               | 71.5 | 69.9              | 78.9 |
|                        | Gene Sp | 48.5 | 49.7 | 53.9               | 77.9 | 63.5              | 83.1 |
|                        | Gene F1 | 49.8 | 51.4 | 55.1               | 74.6 | 66.5              | 80.9 |
|                        | Exon Sn | 67.8 | 68.6 | 70.2               | 76.4 | 76.5              | 80.7 |
|                        | Exon Sp | 72.8 | 74.2 | 77.3               | 89.7 | 81.1              | 91.4 |
|                        | Exon F1 | 70.2 | 71.3 | 73.6               | 82.5 | 78.8              | 85.7 |
| <i>S. lycopersicum</i> | Gene Sn | 43.4 | 47.2 | 67.0               | 88.2 | 72.7              | 90.2 |
|                        | Gene Sp | 33.3 | 37.4 | 51.3               | 81.4 | 54.8              | 79.8 |
|                        | Gene F1 | 37.7 | 41.7 | 58.1               | 84.7 | 62.5              | 84.6 |
|                        | Exon Sn | 82.6 | 83.5 | 90.5               | 96.7 | 92.1              | 97.2 |
|                        | Exon Sp | 69.4 | 74.2 | 80.0               | 92.6 | 80.7              | 91.6 |
|                        | Exon F1 | 75.5 | 78.6 | 84.9               | 94.6 | 86.0              | 94.3 |
| <i>D. rerio</i>        | Gene Sn | 13.2 | 20.4 | 35.7               | 72.7 | 39.6              | 73.8 |
|                        | Gene Sp | 4.6  | 7.5  | 13.3               | 56.5 | 14.7              | 56.8 |
|                        | Gene F1 | 6.9  | 11.0 | 19.4               | 63.6 | 21.4              | 64.2 |
|                        | Exon Sn | 75.3 | 79.1 | 84.9               | 93.6 | 86.2              | 94.0 |
|                        | Exon Sp | 40.8 | 50.3 | 55.9               | 85.1 | 56.5              | 85.1 |
|                        | Exon F1 | 52.9 | 61.5 | 67.4               | 89.2 | 68.2              | 89.3 |
| <i>G. gallus</i>       | Gene Sn | 0.1  | 2.4  | 14.1               | 78.0 | 14.4              | 77.5 |
|                        | Gene Sp | 0.1  | 1.4  | 11.3               | 67.2 | 11.6              | 65.9 |
|                        | Gene F1 | 0.1  | 1.8  | 12.6               | 72.2 | 12.9              | 71.2 |
|                        | Exon Sn | 0.3  | 15.1 | 28.7               | 95.4 | 29.0              | 95.4 |
|                        | Exon Sp | 0.2  | 27.0 | 53.4               | 90.7 | 53.8              | 90.3 |
|                        | Exon F1 | 0.2  | 19.3 | 37.3               | 93.0 | 37.7              | 92.8 |
| <i>M. musculus</i>     | Gene Sn | 2.2  | 7.8  | 22.0               | 71.3 | 23.7              | 72.7 |
|                        | Gene Sp | 2.0  | 5.4  | 15.0               | 66.0 | 16.0              | 65.9 |
|                        | Gene F1 | 2.1  | 6.4  | 17.8               | 68.6 | 19.1              | 69.1 |
|                        | Exon Sn | 25.4 | 49.7 | 57.3               | 91.2 | 58.1              | 91.7 |
|                        | Exon Sp | 25.4 | 50.9 | 64.2               | 90.7 | 64.8              | 90.7 |
|                        | Exon F1 | 25.4 | 50.3 | 60.6               | 91.0 | 61.3              | 91.2 |

**Table S2.** Comparison of gene- and exon-level prediction accuracy between RNA-Seq-based BRAKER1, protein-based BRAKER2, TSEBRA (a tool generating the combination of BRAKER1 and BRAKER2 results), and GeneMark-ETP. The accuracy estimates are shown for the smaller (order excluded) and for the larger (species excluded) protein databases (see Materials).

|                        |         | BRAKER1 | Smaller protein DB |        |      | Larger protein DB |        |      |
|------------------------|---------|---------|--------------------|--------|------|-------------------|--------|------|
|                        |         |         | BRAKER2            | TSEBRA | ETP  | BRAKER2           | TSEBRA | ETP  |
| <i>C. elegans</i>      | Gene Sn | 61.8    | 46.8               | 60.3   | 60.4 | 69.0              | 71.1   | 68.4 |
|                        | Gene Sp | 65.6    | 54.1               | 77.5   | 67.7 | 70.1              | 80.5   | 73.8 |
|                        | Gene F1 | 63.6    | 50.2               | 67.8   | 63.8 | 69.6              | 75.5   | 71.0 |
|                        | Exon Sn | 85.0    | 74.0               | 76.6   | 82.9 | 84.8              | 83.9   | 85.9 |
|                        | Exon Sp | 88.5    | 87.8               | 93.4   | 90.1 | 91.5              | 93.8   | 91.4 |
|                        | Exon F1 | 86.7    | 80.3               | 84.2   | 86.4 | 88.0              | 88.6   | 88.6 |
| <i>A. thaliana</i>     | Gene Sn | 59.6    | 72.6               | 73.6   | 75.8 | 79.2              | 79.3   | 77.9 |
|                        | Gene Sp | 61.3    | 70.1               | 81.2   | 80.0 | 75.6              | 82.8   | 81.0 |
|                        | Gene F1 | 60.4    | 71.3               | 77.2   | 77.8 | 77.4              | 81.0   | 79.4 |
|                        | Exon Sn | 78.3    | 81.0               | 79.6   | 82.3 | 83.1              | 82.7   | 82.9 |
|                        | Exon Sp | 82.5    | 88.4               | 93.7   | 90.9 | 88.2              | 93.2   | 91.0 |
|                        | Exon F1 | 80.4    | 84.5               | 86.1   | 86.4 | 85.6              | 87.6   | 86.8 |
| <i>D. melanogaster</i> | Gene Sn | 63.8    | 61.1               | 68.0   | 71.5 | 78.9              | 80.0   | 78.9 |
|                        | Gene Sp | 62.3    | 60.9               | 75.4   | 77.9 | 73.6              | 80.9   | 83.1 |
|                        | Gene F1 | 63.0    | 61.0               | 71.5   | 74.6 | 76.1              | 80.4   | 80.9 |
|                        | Exon Sn | 77.0    | 71.4               | 72.1   | 76.4 | 80.1              | 79.8   | 80.7 |
|                        | Exon Sp | 80.9    | 83.4               | 89.9   | 89.7 | 88.5              | 92.2   | 91.4 |
|                        | Exon F1 | 78.9    | 76.9               | 80.0   | 82.5 | 84.1              | 85.6   | 85.7 |
| <i>S. lycopersicum</i> | Gene Sn | 61.8    | 79.6               | 82.5   | 88.2 | 84.2              | 85.4   | 90.2 |
|                        | Gene Sp | 47.1    | 56.5               | 71.3   | 81.4 | 58.9              | 72.1   | 79.8 |
|                        | Gene F1 | 53.5    | 66.1               | 76.5   | 84.7 | 69.3              | 78.2   | 84.6 |
|                        | Exon Sn | 90.7    | 94.2               | 94.9   | 96.7 | 95.4              | 96.1   | 97.2 |
|                        | Exon Sp | 75.5    | 82.8               | 90.3   | 92.6 | 82.3              | 90.2   | 91.6 |
|                        | Exon F1 | 82.4    | 88.1               | 92.5   | 94.6 | 88.4              | 93.0   | 94.3 |
| <i>D. rerio</i>        | Gene Sn | 51.7    | 55.0               | 66.9   | 72.7 | 57.8              | 69.0   | 73.8 |
|                        | Gene Sp | 28.1    | 29.5               | 45.7   | 56.5 | 27.9              | 46.0   | 56.8 |
|                        | Gene F1 | 36.4    | 38.4               | 54.3   | 63.6 | 37.6              | 55.2   | 64.2 |
|                        | Exon Sn | 91.1    | 88.0               | 89.4   | 93.6 | 89.4              | 90.1   | 94.0 |
|                        | Exon Sp | 75.4    | 78.9               | 87.2   | 85.1 | 76.2              | 86.8   | 85.1 |
|                        | Exon F1 | 82.5    | 83.2               | 88.3   | 89.2 | 82.2              | 88.4   | 89.3 |
| <i>G. gallus</i>       | Gene Sn | 6.6     | 25.2               | 26.7   | 78.0 | 27.2              | 28.3   | 77.5 |
|                        | Gene Sp | 3.5     | 16.6               | 22.2   | 67.2 | 18.1              | 23.3   | 65.9 |
|                        | Gene F1 | 4.6     | 20.0               | 24.2   | 72.2 | 21.7              | 25.6   | 71.2 |
|                        | Exon Sn | 66.1    | 35.0               | 59.8   | 95.4 | 35.3              | 60.0   | 95.4 |
|                        | Exon Sp | 48.1    | 59.2               | 74.4   | 90.7 | 60.6              | 74.4   | 90.3 |
|                        | Exon F1 | 55.7    | 44.0               | 66.3   | 93.0 | 44.6              | 66.4   | 92.8 |
| <i>M. musculus</i>     | Gene Sn | 27.8    | 32.5               | 44.2   | 71.3 | 35.9              | 46.7   | 72.7 |
|                        | Gene Sp | 14.8    | 21.2               | 31.3   | 66.0 | 23.2              | 32.7   | 65.9 |
|                        | Gene F1 | 19.3    | 25.7               | 36.7   | 68.6 | 28.2              | 38.5   | 69.1 |
|                        | Exon Sn | 83.9    | 57.6               | 77.4   | 91.2 | 59.3              | 78.1   | 91.7 |
|                        | Exon Sp | 67.5    | 71.6               | 83.3   | 90.7 | 72.7              | 83.5   | 90.7 |
|                        | Exon F1 | 74.8    | 63.8               | 80.2   | 91.0 | 65.3              | 80.7   | 91.2 |

**Table S3.** A gene-level accuracy evaluation of initial GeneMarkS-T predictions and the refined ones which are used to identify the high-confidence genes. The accuracy is shown separately for complete and partial predictions as well as for both sets together (Combined). The first three columns (Raw GeneMarkS-T) show the accuracy of unprocessed GeneMarkS-T predictions in all assembled transcripts. The remaining columns (HC genes) show the accuracy of the processed, high-confidence gene sets. The accuracy of HC genes is shown for the smaller (order excluded) and for the larger (species excluded) protein databases (see Materials).

|                        |    | Raw GeneMarkS-T |         |          | HC genes           |         |          |                   |         |          |
|------------------------|----|-----------------|---------|----------|--------------------|---------|----------|-------------------|---------|----------|
|                        |    |                 |         |          | Smaller protein DB |         |          | Larger protein DB |         |          |
|                        |    | Complete        | Partial | Combined | Complete           | Partial | Combined | Complete          | Partial | Combined |
| <i>C. elegans</i>      | Sn | 42.9            | 3.9     | 46.8     | 33.6               | 2.1     | 35.7     | 47.7              | 4.0     | 51.7     |
|                        | Sp | 82.0            | 18.2    | 63.4     | 88.8               | 81.5    | 88.4     | 91.5              | 80.7    | 90.6     |
| <i>A. thaliana</i>     | Sn | 49.8            | 1.4     | 51.2     | 55.6               | 1.1     | 56.7     | 57.3              | 1.6     | 58.8     |
|                        | Sp | 89.1            | 17.0    | 79.9     | 97.4               | 92.3    | 97.3     | 97.8              | 90.8    | 97.6     |
| <i>D. melanogaster</i> | Sn | 56.4            | 3.2     | 59.6     | 53.3               | 1.8     | 55.0     | 60.6              | 3.1     | 63.7     |
|                        | Sp | 87.5            | 38.1    | 81.8     | 95.0               | 85.3    | 94.7     | 96.9              | 85.0    | 96.3     |
| <i>S. lycopersicum</i> | Sn | 66.3            | 1.4     | 67.8     | 73.7               | 1.3     | 74.9     | 74.2              | 1.5     | 75.6     |
|                        | Sp | 84.1            | 26.6    | 77.8     | 95.4               | 87.2    | 95.2     | 95.4              | 84.8    | 95.1     |
| <i>D. rerio</i>        | Sn | 55.3            | 4.3     | 59.6     | 62.8               | 4.2     | 67.0     | 62.4              | 4.5     | 66.9     |
|                        | Sp | 68.4            | 32.8    | 59.9     | 89.7               | 78.9    | 88.5     | 92.8              | 75.3    | 90.4     |
| <i>G. gallus</i>       | Sn | 43.9            | 5.7     | 49.6     | 67.9               | 6.5     | 74.4     | 66.3              | 7.7     | 74.0     |
|                        | Sp | 64.0            | 23.0    | 47.0     | 89.5               | 86.1    | 89.1     | 90.0              | 80.3    | 88.4     |
| <i>M. musculus</i>     | Sn | 48.4            | 1.2     | 49.6     | 60.8               | 2.7     | 63.5     | 60.5              | 3.4     | 63.9     |
|                        | Sp | 80.4            | 9.6     | 63.2     | 95.1               | 68.0    | 93.2     | 96.7              | 69.8    | 94.5     |

**Table S4.** Accuracy of the transcript classification as complete/partial (described in the main text). The transcripts used in this evaluation were i/ classified as partial by GeneMarkS-T, ii/ had a correctly predicted stop codon, and iii/ contained no assembly errors. The names of rows and columns are the same as in the confusion matrix shown in Table 2, see Results. Sensitivity represents the percentage of complete transcripts that were classified as such. The error rate is defined as the percentage of partial transcripts incorrectly classified as complete. The results are shown for the smaller (order excluded) and for the larger (species excluded) protein databases.

|                        |                        | Smaller protein DB |         |          | Larger protein DB |         |          |
|------------------------|------------------------|--------------------|---------|----------|-------------------|---------|----------|
|                        |                        | Complete           | Partial | Accuracy | Complete          | Partial | Accuracy |
| <i>C. elegans</i>      | Predicted complete     | 1488               | 127     |          | 1982              | 78      |          |
|                        | Predicted partial      | 273                | 207     |          | 393               | 471     |          |
|                        | Sensitivity (complete) |                    |         | 84.5     |                   |         | 83.5     |
|                        | Error rate (partial)   |                    |         | 38.0     |                   |         | 14.2     |
| <i>A. thaliana</i>     | Predicted complete     | 1476               | 55      |          | 1442              | 22      |          |
|                        | Predicted partial      | 107                | 203     |          | 165               | 249     |          |
|                        | Sensitivity (complete) |                    |         | 93.2     |                   |         | 89.7     |
|                        | Error rate (partial)   |                    |         | 21.3     |                   |         | 8.1      |
| <i>D. melanogaster</i> | Predicted complete     | 273                | 76      |          | 299               | 9       |          |
|                        | Predicted partial      | 48                 | 254     |          | 130               | 388     |          |
|                        | Sensitivity (complete) |                    |         | 85.1     |                   |         | 69.7     |
|                        | Error rate (partial)   |                    |         | 23.0     |                   |         | 2.3      |
| <i>S. lycopersicum</i> | Predicted complete     | 897                | 81      |          | 868               | 63      |          |
|                        | Predicted partial      | 81                 | 322     |          | 119               | 358     |          |
|                        | Sensitivity (complete) |                    |         | 91.7     |                   |         | 87.9     |
|                        | Error rate (partial)   |                    |         | 20.1     |                   |         | 15.0     |
| <i>D. rerio</i>        | Predicted complete     | 1152               | 107     |          | 1052              | 69      |          |
|                        | Predicted partial      | 249                | 1242    |          | 364               | 1318    |          |
|                        | Sensitivity (complete) |                    |         | 82.2     |                   |         | 74.3     |
|                        | Error rate (partial)   |                    |         | 7.9      |                   |         | 5.0      |
| <i>G. gallus</i>       | Predicted complete     | 3232               | 197     |          | 2972              | 114     |          |
|                        | Predicted partial      | 449                | 849     |          | 715               | 937     |          |
|                        | Sensitivity (complete) |                    |         | 87.8     |                   |         | 80.6     |
|                        | Error rate (partial)   |                    |         | 18.8     |                   |         | 10.9     |
| <i>M. musculus</i>     | Predicted complete     | 2026               | 16      |          | 1879              | 8       |          |
|                        | Predicted partial      | 497                | 205     |          | 642               | 216     |          |
|                        | Sensitivity (complete) |                    |         | 80.3     |                   |         | 74.53    |
|                        | Error rate (partial)   |                    |         | 7.2      |                   |         | 3.6      |



**Table S5.** Distribution of the predicted exons among four categories along with average Specificity values (exon level) for each category. The categories differ by the strength of extrinsic evidence for predicted genes (see text). Descriptions of the species-specific smaller and larger protein databases are given in Methods.

| Species                | Types of support             | Smaller protein DB |                | Larger protein DB |                |
|------------------------|------------------------------|--------------------|----------------|-------------------|----------------|
|                        |                              | # of exons         | Specificity, % | # of exons        | Specificity, % |
| <i>C. elegans</i>      | Fully extrinsic              | 53,534             | 97.17          | 74,548            | 97.28          |
|                        | Partially extrinsic          | 38,696             | 88.43          | 37,472            | 86.24          |
|                        | Ab initio anchored           | 21,962             | 83.77          | 7,279             | 74.31          |
|                        | <i>Ab initio unsupported</i> | 4,769              | 54.54          | 2,286             | 37.18          |
| <i>A. thaliana</i>     | Fully extrinsic              | 102,615            | 98.84          | 108,633           | 98.79          |
|                        | Partially extrinsic          | 25,406             | 85.15          | 26,650            | 77.37          |
|                        | Ab initio anchored           | 6,538              | 63.51          | 4,759             | 37.57          |
|                        | <i>Ab initio unsupported</i> | 7,384              | 24.74          | 2,829             | 11.52          |
| <i>D. melanogaster</i> | Fully extrinsic              | 35,300             | 97.72          | 42,821            | 97.67          |
|                        | Partially extrinsic          | 12,443             | 82.17          | 11,455            | 76.88          |
|                        | Ab initio anchored           | 3,175              | 76.28          | 329               | 52.89          |
|                        | <i>Ab initio unsupported</i> | 2,766              | 36.26          | 1,084             | 9.41           |
| <i>S. lycopersicum</i> | Fully extrinsic              | 108,024            | 98.37          | 110,645           | 98.29          |
|                        | Partially extrinsic          | 25,610             | 75.58          | 26,784            | 71.95          |
|                        | Ab initio anchored           | 5,507              | 59.52          | 4,893             | 47.29          |
|                        | <i>Ab initio unsupported</i> | 11,112             | 17.02          | 8,799             | 12.48          |
| <i>D. rerio</i>        | Fully extrinsic              | 156,781            | 97.59          | 156,506           | 98.12          |
|                        | Partially extrinsic          | 102,256            | 70.55          | 105,941           | 69.77          |
|                        | Ab initio anchored           | 9,398              | 34.35          | 7,360             | 27.35          |
|                        | <i>Ab initio unsupported</i> | 43,023             | 2.51           | 40,983            | 1.85           |
| <i>G. gallus</i>       | Fully extrinsic              | 129,144            | 98.16          | 126,410           | 98.24          |
|                        | Partially extrinsic          | 50,046             | 75.08          | 53,784            | 75.18          |
|                        | Ab initio anchored           | 2,968              | 31.2           | 3,008             | 25.37          |
|                        | <i>Ab initio unsupported</i> | 33,168             | 0.71           | 33,111            | 0.58           |
| <i>M. musculus</i>     | Fully extrinsic              | 141,520            | 99.1           | 143,186           | 99.29          |
|                        | Partially extrinsic          | 55,236             | 72.95          | 55,394            | 72.5           |
|                        | Ab initio anchored           | 5,202              | 49.81          | 5,063             | 43.12          |
|                        | <i>Ab initio unsupported</i> | 61,229             | 2.08           | 58,337            | 1.15           |

**Table S6.** Gene- and exon-level prediction accuracy of GeneMark-ETP with and without filtering of pure *ab initio* predictions. The superior F1 accuracy is highlighted in bold. The unverified *ab initio* predictions were removed from the GeneMark-ETP outputs for genomes larger than 300 Mbp in length (the bottom four genomes). For each genome, the results are shown for the smaller (order excluded) and for the larger (species excluded) protein databases.

|                        |         | Smaller protein DB |                          | Larger protein DB |                          |
|------------------------|---------|--------------------|--------------------------|-------------------|--------------------------|
|                        |         | All predictions    | <i>Ab initio</i> removed | All predictions   | <i>Ab initio</i> removed |
| <i>C. elegans</i>      | Gene Sn | 60.4               | 58.7                     | 68.4              | 67.7                     |
|                        | Gene Sp | 67.7               | 71.1                     | 73.8              | 76.2                     |
|                        | Gene F1 | 63.8               | <b>64.3</b>              | 71.0              | <b>71.7</b>              |
|                        | Exon Sn | 82.9               | 80.9                     | 85.9              | 85.3                     |
|                        | Exon Sp | 90.1               | 91.6                     | 91.4              | 92.4                     |
|                        | Exon F1 | <b>86.4</b>        | 86.0                     | 88.6              | <b>88.7</b>              |
| <i>A. thaliana</i>     | Gene Sn | 75.8               | 72.8                     | 77.9              | 77.5                     |
|                        | Gene Sp | 80.0               | 86.7                     | 81.0              | 84.2                     |
|                        | Gene F1 | 77.8               | <b>79.1</b>              | 79.4              | <b>80.7</b>              |
|                        | Exon Sn | 82.3               | 81.1                     | 82.9              | 82.7                     |
|                        | Exon Sp | 90.9               | 94.6                     | 91.0              | 92.6                     |
|                        | Exon F1 | 86.4               | <b>87.3</b>              | 86.8              | <b>87.4</b>              |
| <i>D. melanogaster</i> | Gene Sn | 71.5               | 67.4                     | 78.9              | 78.4                     |
|                        | Gene Sp | 77.9               | 82.3                     | 83.1              | 85.0                     |
|                        | Gene F1 | <b>74.6</b>        | 74.1                     | 80.9              | <b>81.6</b>              |
|                        | Exon Sn | 76.4               | 74.8                     | 80.7              | 80.6                     |
|                        | Exon Sp | 89.7               | 92.6                     | 91.4              | 93.0                     |
|                        | Exon F1 | <b>82.5</b>        | 82.7                     | 85.7              | <b>86.4</b>              |
| <i>S. lycopersicum</i> | Gene Sn | 89.5               | 88.2                     | 90.6              | 90.2                     |
|                        | Gene Sp | 70.6               | 81.4                     | 70.9              | 79.8                     |
|                        | Gene F1 | 78.9               | <b>84.7</b>              | 79.5              | <b>84.6</b>              |
|                        | Exon Sn | 97.1               | 96.7                     | 97.4              | 97.2                     |
|                        | Exon Sp | 87.1               | 92.6                     | 87.0              | 91.6                     |
|                        | Exon F1 | 91.8               | <b>94.6</b>              | 91.9              | <b>94.3</b>              |
| <i>D. rerio</i>        | Gene Sn | 72.9               | 72.7                     | 73.8              | 73.8                     |
|                        | Gene Sp | 39.4               | 56.5                     | 40.3              | 56.8                     |
|                        | Gene F1 | 51.2               | <b>63.6</b>              | 52.2              | <b>64.2</b>              |
|                        | Exon Sn | 93.9               | 93.6                     | 94.2              | 94.0                     |
|                        | Exon Sp | 73.7               | 85.1                     | 74.1              | 85.1                     |
|                        | Exon F1 | 82.5               | <b>89.2</b>              | 82.9              | <b>89.3</b>              |
| <i>G. gallus</i>       | Gene Sn | 78.1               | 78.0                     | 77.5              | 77.5                     |
|                        | Gene Sp | 40.7               | 67.2                     | 40.0              | 65.9                     |
|                        | Gene F1 | 53.5               | <b>72.2</b>              | 52.8              | <b>71.2</b>              |
|                        | Exon Sn | 95.5               | 95.4                     | 95.4              | 95.4                     |
|                        | Exon Sp | 76.9               | 90.7                     | 76.5              | 90.3                     |
|                        | Exon F1 | 85.2               | <b>93.0</b>              | 85.0              | <b>92.8</b>              |
| <i>M. musculus</i>     | Gene Sn | 71.7               | 71.3                     | 72.8              | 72.7                     |
|                        | Gene Sp | 34.5               | 66.0                     | 35.3              | 65.9                     |
|                        | Gene F1 | 46.5               | <b>68.6</b>              | 47.6              | <b>69.1</b>              |
|                        | Exon Sn | 91.6               | 91.2                     | 92.0              | 91.7                     |
|                        | Exon Sp | 70.1               | 90.7                     | 70.7              | 90.7                     |
|                        | Exon F1 | 79.4               | <b>91.0</b>              | 79.9              | <b>91.2</b>              |

**Table S7.** The values of the masking penalty parameter estimated by GeneMark-ETP for each of the tested genomes (natural logarithms). For GC-heterogeneous genomes, the optimal masking penalty parameter was estimated for each of the GC bins. For each species, the results are shown for the smaller and larger protein databases (see caption to Table S6).

|                        | Smaller protein DB |        |      | Larger protein DB |        |      |
|------------------------|--------------------|--------|------|-------------------|--------|------|
|                        | Low                | Medium | High | Low               | Medium | High |
| <i>C. elegans</i>      | 0.06               |        |      | 0.05              |        |      |
| <i>A. thaliana</i>     | 0.03               |        |      | 0.03              |        |      |
| <i>D. melanogaster</i> | 0.08               |        |      | 0.08              |        |      |
| <i>S. lycopersicum</i> | 0.04               |        |      | 0.04              |        |      |
| <i>D. rerio</i>        | 0.08               |        |      | 0.09              |        |      |
| GC                     | Low                | Medium | High | Low               | Medium | High |
| <i>G. gallus</i>       | 0.15               | 0.17   | 0.12 | 0.14              | 0.16   | 0.11 |
| <i>M. musculus</i>     | 0.13               | 0.14   | 0.14 | 0.14              | 0.14   | 0.14 |

**Table S8:** Data sources used in the tests. A date in parenthesis shows the date of the last update. \*The reliable subset for *M. musculus* was selected by choosing a subset of GENCODE transcripts with the following attributes: *CCDS* (Agreement with RefSeq annotation), *transcript\_support\_level=1* (All splice junctions of the transcript were supported by at least one non-suspect mRNA), and *basic* (prioritizes full-length protein-coding transcripts over partial or non-protein-coding transcripts within the same gene).

| Species                | Assembly version | Main annotation                    | Supplementary annotation used to prepare the reliable subset |
|------------------------|------------------|------------------------------------|--------------------------------------------------------------|
| <i>C. elegans</i>      | GCF_000002985.6  | Wormbase WS284 (Feb 2022)          | -                                                            |
| <i>A. thaliana</i>     | GCF_000001735.4  | Araport11 (Mar 2021)               | -                                                            |
| <i>D. melanogaster</i> | GCF_000001215.4  | FlyBase r6.44 (Feb 2022)           | -                                                            |
| <i>S. lycopersicum</i> | GCF_000188115.4  | NCBI annot. Release 103 (Jun 2019) | ITAG3.2 (Jun 2017)                                           |
| <i>D. rerio</i>        | GCF_000002035.6  | NCBI annot. Release 106 (Oct 2019) | Ensembl GRCz11.105 (Oct 2021)                                |
| <i>G. gallus</i>       | GCF_000002315.6  | NCBI annot. Release 104 (Mar 2020) | Ensembl GRCg6a.105 (Oct 2021)                                |
| <i>M. musculus</i>     | GCF_000001635.27 | GENCODE M28 (Dec 2021)             | RefSeq*                                                      |

**Table S9:** Composition of the clades of OrthoDB v10.1 used by GeneMark-ETP. The bold case black numbers show the largest numbers of species that could be used to support gene predictions for a given species (left column). These numbers correspond to the species-specific IP<sub>0</sub> databases (see Materials). The numbers of species removed from the species-specific IP<sub>0</sub> databases to make corresponding larger and smaller protein databases are shown in blue.

| Species                | # of species in the OrthoDB clade |        |           |       |            |            | Name of the largest OrthoDB segment | # of proteins in the OrthoDB segment |
|------------------------|-----------------------------------|--------|-----------|-------|------------|------------|-------------------------------------|--------------------------------------|
|                        | Genus                             | Family | Order     | Class | Phylum     | Kingdom    |                                     |                                      |
| <i>C. elegans</i>      | <b>3</b>                          | 3      | <b>5</b>  | 6     | 7          | <b>448</b> | Metazoa                             | 8,266,016                            |
| <i>A. thaliana</i>     | <b>2</b>                          | 8      | <b>10</b> | -     | 100        | <b>117</b> | Plantae                             | 3,510,742                            |
| <i>D. melanogaster</i> | <b>20</b>                         | 20     | <b>56</b> | 148   | <b>170</b> | -          | Arthropoda                          | 2,601,995                            |
| <i>S. lycopersicum</i> | <b>2</b>                          | 10     | <b>11</b> | -     | 100        | <b>117</b> | Plantae                             | 3,510,742                            |
| <i>D. rerio</i>        | <b>1</b>                          | 5      | <b>5</b>  | 50    | <b>246</b> | -          | Chordata                            | 5,003,104                            |
| <i>G. gallus</i>       | <b>1</b>                          | 3      | <b>4</b>  | 62    | 246        | -          | Chordata                            | 5,003,104                            |
| <i>M. musculus</i>     | <b>3</b>                          | 5      | <b>20</b> | 111   | 246        | -          | Chordata                            | 5,003,104                            |

**Table S10:** RNA-Seq libraries used for the experiments with GeneMark-ETP.

| Species                | RNA-Seq library ID | Number of paired reads (M) | Read length (nt) | Library size (Gb) |
|------------------------|--------------------|----------------------------|------------------|-------------------|
| <i>C. elegans</i>      | SRR065717          | 29.1                       | 76               | 4.4               |
|                        | SRR065719          | 73.3                       | 76               | 11.1              |
|                        | SRR473298          | 19.9                       | 100              | 4.0               |
|                        | SRR2054452         | 10.2                       | 100              | 2.0               |
|                        | Total              | 132.5                      |                  | 21.5              |
| <i>A. thaliana</i>     | SRR934391          | 20.0                       | 101              | 4.0               |
|                        | SRR5588566         | 24.7                       | 125              | 6.2               |
|                        | SRR7169927         | 19.2                       | 101              | 3.9               |
|                        | Total              | 63.9                       |                  | 14.1              |
| <i>D. melanogaster</i> | SRR023505          | 8.4                        | 76               | 1.3               |
|                        | SRR023546          | 8.9                        | 76               | 1.4               |
|                        | SRR023608          | 11.9                       | 76               | 1.8               |
|                        | SRR026433          | 22.1                       | 76               | 3.4               |
|                        | SRR027108          | 7.2                        | 76               | 1.1               |
|                        | Total              | 58.5                       |                  | 9.0               |
| <i>S. lycopersicum</i> | SRR2002284         | 56.2                       | 73               | 8.2               |
|                        | SRR7959012         | 25.4                       | 149              | 7.6               |
|                        | SRR7959019         | 27.9                       | 149              | 8.3               |
|                        | SRR14055940        | 21.2                       | 150              | 6.4               |
|                        | Total              | 130.7                      |                  | 30.5              |
| <i>D. rerio</i>        | SRR9735169         | 28.2                       | 75               | 4.2               |
|                        | SRR10004226        | 21.6                       | 150              | 6.5               |
|                        | SRR10040127        | 25.9                       | 126              | 6.5               |
|                        | Total              | 75.7                       |                  | 17.2              |
| <i>G. gallus</i>       | ERR2812450         | 44.9                       | 150              | 13.5              |
|                        | SRR3971633         | 24.0                       | 100              | 4.8               |
|                        | SRR6337028         | 10.0                       | 100              | 2.0               |
|                        | SRR11038071        | 16.4                       | 151              | 5.0               |
|                        | Total              | 95.3                       |                  | 25.3              |
| <i>M. musculus</i>     | SRR567480          | 155.7                      | 101              | 31.5              |
|                        | SRR567482          | 161.1                      | 101              | 32.5              |
|                        | SRR567497          | 94.3                       | 101              | 19.0              |
|                        | Total              | 411.1                      |                  | 83.0              |

**Table S11:** Performance of MAKER2 and GeneMark-ETP gene prediction algorithms on three model species.

| <i>Drosophila melanogaster</i> |    |       |              |      |
|--------------------------------|----|-------|--------------|------|
|                                |    | MAKER | GeneMark-ETP | diff |
| exon                           | Sn | 75.2  | <b>80.7</b>  | 5.6  |
|                                | Sp | 74.0  | <b>91.4</b>  | 17.5 |
|                                | F1 | 74.6  | <b>85.7</b>  | 11.2 |
| gene                           | Sn | 60.2  | <b>79.0</b>  | 18.8 |
|                                | Sp | 55.3  | <b>83.0</b>  | 27.7 |
|                                | F1 | 57.7  | <b>81.0</b>  | 23.3 |
| transcript                     | Sn | 38.3  | <b>54.8</b>  | 16.5 |
|                                | Sp | 51.7  | <b>79.4</b>  | 27.7 |
|                                | F1 | 44.0  | <b>64.8</b>  | 20.8 |
| <i>Danio rerio</i>             |    |       |              |      |
|                                |    | MAKER | GeneMark-ETP | diff |
| exon                           | Sn | 83.3  | <b>93.9</b>  | 10.7 |
|                                | Sp | 79.2  | <b>84.9</b>  | 5.7  |
|                                | F1 | 81.2  | <b>89.2</b>  | 8.0  |
| gene                           | Sn | 47.7  | <b>73.5</b>  | 25.9 |
|                                | Sp | 37.6  | <b>56.2</b>  | 18.6 |
|                                | F1 | 42.0  | <b>63.7</b>  | 21.7 |
| transcript                     | Sn | 42.8  | <b>68.5</b>  | 25.7 |
|                                | Sp | 35.1  | <b>55.8</b>  | 20.7 |
|                                | F1 | 38.5  | <b>61.5</b>  | 22.9 |
| <i>Mus musculus</i>            |    |       |              |      |
|                                |    | MAKER | GeneMark-ETP | diff |
| exon                           | Sn | 79.2  | <b>91.7</b>  | 12.6 |
|                                | Sp | 77.4  | <b>87.9</b>  | 10.5 |
|                                | F1 | 78.3  | <b>89.8</b>  | 11.5 |
| gene                           | Sn | 41.6  | <b>73.1</b>  | 31.5 |
|                                | Sp | 34.8  | <b>59.7</b>  | 24.9 |
|                                | F1 | 37.9  | <b>65.7</b>  | 27.8 |
| transcript                     | Sn | 33.4  | <b>61.9</b>  | 28.5 |
|                                | Sp | 32.2  | <b>61.9</b>  | 29.7 |
|                                | F1 | 32.8  | <b>61.9</b>  | 29.1 |

## References

Buchfink B, Xie C, Huson DH. 2015. Fast and sensitive protein alignment using DIAMOND. *Nat Methods* **12**: 59-60.
